# Supplementary material for: Effects of Renal Denervation on Renal Artery Function in Humans: Preliminary Study
Source: PubMed Central journal article supplement (PMC4803336; doi:10.1371/journal.pone.0150662), 2016-03-22
Supplement: pone.0150662.s001.pdf [file pone.0150662.s001.pdf]

## **SUPPORTING INFORMATION 1**

S1 Table: Inter- and intraobserver reproducibility

|                  | Interobserver       | Intraobserver       |
|------------------|---------------------|---------------------|
| Peak Velocity    | 0.993 (0.982-0.997) | 0.941 (0.852-0.976) |
| Mean Flow        | 0.985 (0.962-0.994) | 0.921 (0.801-0.969) |
| Min. Area        | 0.948 (0.866-0.980) | 0.935 (0.839-0.974) |
| Max. Area        | 0.930 (0.822-0.973) | 0.953 (0.883-0.981) |
| Vessel sharpness | 0.981 (0.951-0.992) | 0.954 (0.885-0.982) |

Results expressed as intraclass correlation coefficient (95% CI). Min.: minimal,

Max.: maximal.
