# Supplementary material for: Effects of Renal Denervation on Renal Artery Function in Humans: Preliminary Study
Source: PubMed Central journal article supplement (PMC4803336; doi:10.1371/journal.pone.0150662), 2016-03-22
Supplement: pone.0150662.s002.pdf [file pone.0150662.s002.pdf]

## **SUPPORTING INFORMATION 2**

S2 Table: Percentage of change in responders and non-responders

|                | Responders   | Non-responders | p     |
|----------------|--------------|----------------|-------|
| Sharpness      | - 2.3 ± 19.8 | - 0.7 ± 11.8   | 0.647 |
| change (%)     | (- 1.6)      | (- 1.5)        |       |
| Peak velocity  | 8.8 ± 33.9   | 28.3 ± 54.4    | 0.319 |
| change (%)     | (3.3)        | (20.5)         |       |
| Mean flow      | 12.4 ± 50.7  | 42.3 ± 42.1    | 0.054 |
| change (%)     | (5.9)        | (40.3)         |       |
| Min. area      | 23.9 ± 42.8  | 38.7 ± 57.7    | 0.512 |
| change (%)     | (9.2)        | (27.2)         |       |
| Max. area      | 18.8 ± 38.5  | 41.3 ± 69.4    | 0.419 |
| change (%)     | (7.1)        | (28.8)         |       |
| Distensibility | 7.9 ± 43.0   | 8.2 ± 37.1     | 0.986 |
| change (%)     | (- 6.3)      | (1.4)          |       |

Results expressed as mean ± standard deviation (median). Min.: minimal, Max.: maximal. Results correspond to 15 responder patients (30 renal arteries) and 17 non-responder patients (34 renal arteries) for sharpness, and to 8 responder patients (14 renal arteries) and 9 non-responder patients (18 renal arteries) for the remaining variables.
