# Supplementary material for: Effects of Renal Denervation on Renal Artery Function in Humans: Preliminary Study
Source: PubMed Central journal article supplement (PMC4803336; doi:10.1371/journal.pone.0150662), 2016-03-22
Supplement: pone.0150662.s003.pdf [file pone.0150662.s003.pdf]

## **SUPPORTING INFORMATION 3**

S3 Table: Results according to heart rate response

|                                 | Heart rate decrease<br>(n = 22 renal arteries) |                          |       | Heart rate increase or not change<br>(n = 10 renal arteries) |                          |       |
|---------------------------------|------------------------------------------------|--------------------------|-------|--------------------------------------------------------------|--------------------------|-------|
|                                 | Pre- RD                                        | 6 months                 | P     | Pre-RD                                                       | 6 months                 | p     |
| Peak velocity<br>(mm/s)         | 674.9 ± 184.1<br>(628.5)                       | 837.7 ± 308.3<br>(808.5) | 0.006 | 616.7 ± 168.8<br>(611.5)                                     | 613.1 ± 229.8<br>(602.0) | 0.959 |
| Mean flow<br>(ml/s)             | 6.3 ± 3.1<br>(5.6)                             | 7.6 ± 3.5<br>(6.6)       | 0.011 | 4.8 ± 2.0<br>(5.7)                                           | 6.1 ± 3.4<br>(5.2)       | 0.202 |
| Min. area<br>(mm <sup>2</sup> ) | 26.6 ± 8.4<br>(23.0)                           | 30.4 ± 10.0<br>(29.0)    | 0.135 | 20.8 ± 5.7<br>(19.0)                                         | 32.6 ± 13.4<br>(29.5)    | 0.019 |
| Max. area<br>(mm <sup>2</sup> ) | 36.9 ± 10.1<br>(35.5)                          | 41.1 ± 11.9<br>(41.0)    | 0.125 | 30.2 ± 6.2<br>(28.5)                                         | 48.3 ± 22.7<br>(43.0)    | 0.015 |
| Distensibility<br>(1/mmHg)      | 5.9 ± 2.2<br>(5.1)                             | 6.1 ± 1.8<br>(6.1)       | 0.592 | 7.8 ± 2.8<br>(8.8)                                           | 7.6 ± 3.8<br>(7.2)       | 0.575 |

Results expressed as mean ± standard deviation (median). Min.: minimal, Max.: maximal.
